# Supplementary material
Source: publisher figshare collection journal article supplement (https://tandf.figshare.com/ndownloader/files/17298608)
Supplement: Supplementary file 1 [file 17298608]

Supplement Figure


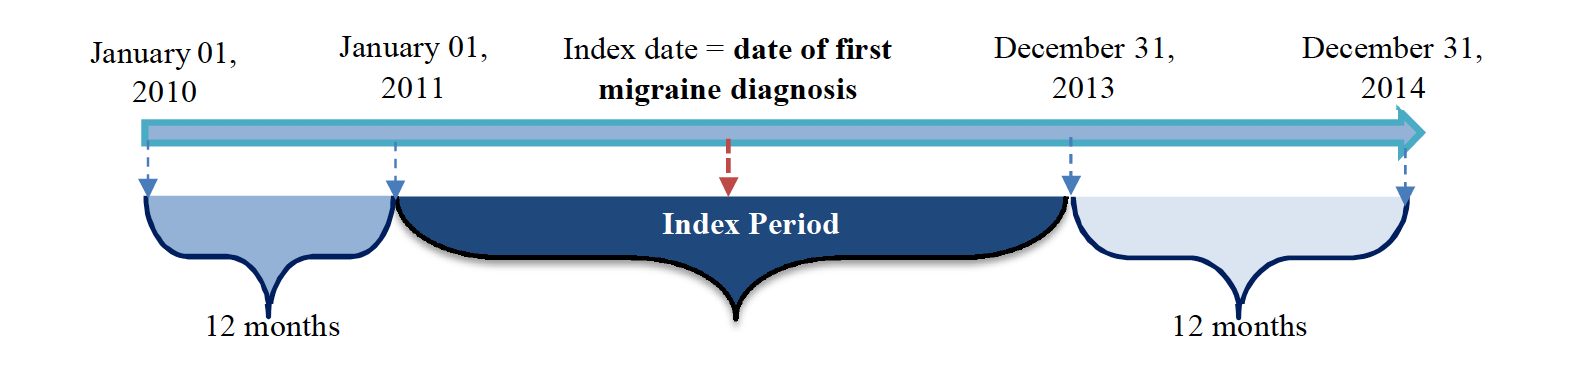


**Supplement Figure Legend**

Time period for patient selection. Source: 2016-4087--Truven Migraine Protocol FINAL page 12.
